# Supplementary material for: One-pot preparation of amine-rich magnetite/bacterial cellulose nanocomposite and its application for arsenate removal
Source: Royal Society of Chemistry journal article supplement (doi:10.1039/c1ra00153a), 2011-01-01
Supplement: c1ra00153a.pdf [file c1ra00153a.pdf]

## Electronic Supplementary Information (ESI)

### One-pot preparation of amin-rich magnetite/bacterial cellulose nanocomposite and its application for arsenate removal

Iryanti Fatyasari Nata, Manthiriyappan Sureshkumar, Cheng-Kang Lee\*

Department of Chemical Engineering  
National Taiwan University of Science and Technology  
43 Keelung Rd Sec. 4, Taipei 106, Taiwan.

\*Author to whom correspondence should be addressed

Tel.: +886 2 2737 6629

Fax: +886 2 2737 6644

Email:cklee@mail.ntust.edu.tw

#### 1. Preparation of magnetite nanoparticles composites

Surface amine-functionalized MNPs were synthesized according to the procedure: anhydrous sodium acetate (1.6 g) and  $\text{FeCl}_3 \cdot 6\text{H}_2\text{O}$  (0.8 g) were dissolved in ethylene glycol (24 mL) with vigorous stirring at 50 °C to give an orange solution. When 1,6-hexanediamine (7 mL) was added, the solution turned to dark-orange. Then magnetite nanoparticles composites BC@MH were synthesized by soaking 3.0 g never-dried BC pellicle into above solution for 24 h before solvothermal was carried out at 200 °C for 6 h. After cooling to room temperature, the BC magnetite composites were collected from the solution by employing a magnet and was rinsed with DI water followed by ethanol each for 3 times to remove the remaining chemicals. The obtained magnetite bacterial cellulose nanocomposites was designated as BC@MH and kept in DI water for future use.

**Table S1** Energy dispersive X-ray (EDX) results of BC and BC@MH

| Sample               | Weight (%) |       |       |
|----------------------|------------|-------|-------|
|                      | C          | O     | Fe    |
| BC                   | 42.27      | 57.73 | -     |
| BC@MH <sup>[a]</sup> | 14.94      | 37.02 | 48.04 |
| BC@MH <sup>[b]</sup> | 15.26      | 32.27 | 52.47 |

[a] on the particle.

[b] on the fiber.

**2. Video S1** Response of aminated magnetite-BC nanocomposites (BC@MH) towards an external magnetic field

### 3. Ninhydrin test for amine group

The presence of amine in MH and BC@MH were determined by using ninhydrin reagent. Typically, 20 mg (approximately 0.2 x 0.2 cm) of BC@MH or MH was added to 100  $\mu$ L of ninhydrin reagent (ethanol 99.8%, 80 w/v% phenol and 5 w/v% ninhydrin) and 100  $\mu$ L DI water. The reaction was carried out at 90 °C for 5 minutes. After cooling at room temperature, 800  $\mu$ L DI water was added. Amine groups on the sample will react with the reagent to produce a purple colored solution.

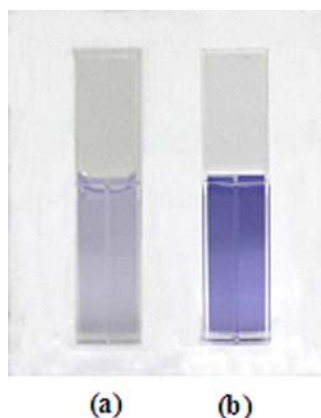

**Fig. S1** Ninhydrin test for amine group assay (a) amine-functionalized MNPs (MH), (b) aminated magnetite-BC nanocomposites (BC@MH) for ten times dilution.

#### 4. Magnetic property

The magnetic property of magnetic nanoparticles (MNPs) was studied by a superconducting quantum interference device (SQUID, LakeShore 7307) magnetometer. 60 mg dry of MH or BC@MH was placed in a capsule, and then put them in the instrument for measured the magnetization.

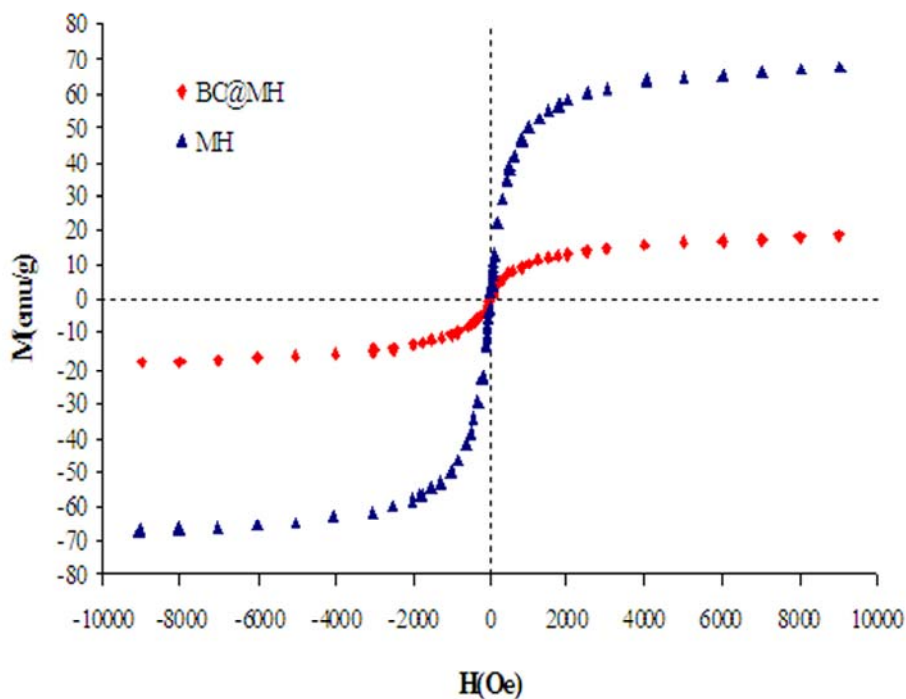

**Fig. S2** Room temperature magnetization curves of amine-functionalized MNPs (MH) and aminated magnetite-BC nanocomposites (BC@MH).

## 5. Mechanical property

Mechanical testing was performed on a testometric test machine (M500-25AT) using a load cell of 10 kg operating at a deformation rate of  $100 \text{ mm s}^{-1}$  for BC and BC@MH, and was performed under ambient conditions. BC and BC@MH were dried at  $130 \text{ }^\circ\text{C}$  in an oven before test. Five samples were tested for each data. Tensile-strain and elongation to break were calculated using the Win test software.

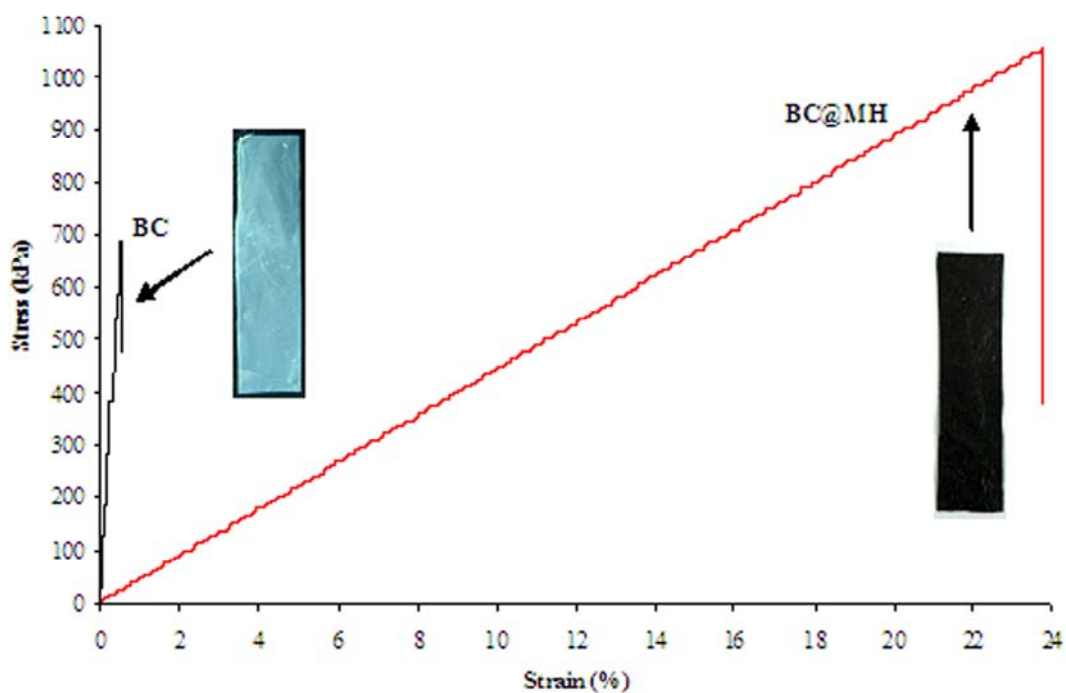

**Fig. S3** Stress-strain curve of bacterial cellulose (BC) aminated magnetite-BC nanocomposites (BC@MH) and insert: dry BC and dry BC@MH.

## 6. Reusable of BC@MH

To regenerate BC@MH for repeated use, As(V) was desorbed from BC@MH (1 w/v%) by shaking in 0.1 M NaOH for 24 h. After washing thoroughly with DI water, the regenerated BC@MH was loaded for the next cycle of As(V) adsorption in the same condition.

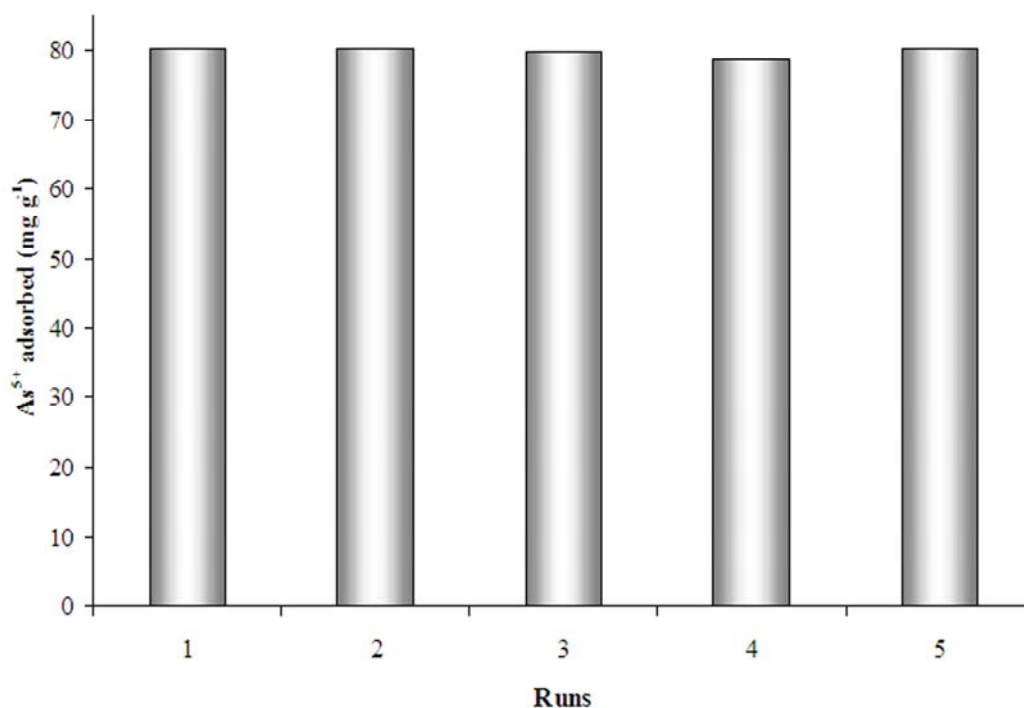

**Fig. S4.** The adsorption performance of BC@MH during 5 repeated used for adsorbing 7 ppm As(V) solutions at 25 °C for 30 h at pH 3.
